# Supplementary figures and images for: Chitosan oligosaccharides exert neuroprotective effectsviamodulating the PI3K/Akt/Bcl-2 pathway in a Parkinsonian model
Source: Royal Society of Chemistry journal article supplement (doi:10.1039/d1fo04374a), 2022-01-01

raw images of Western blot

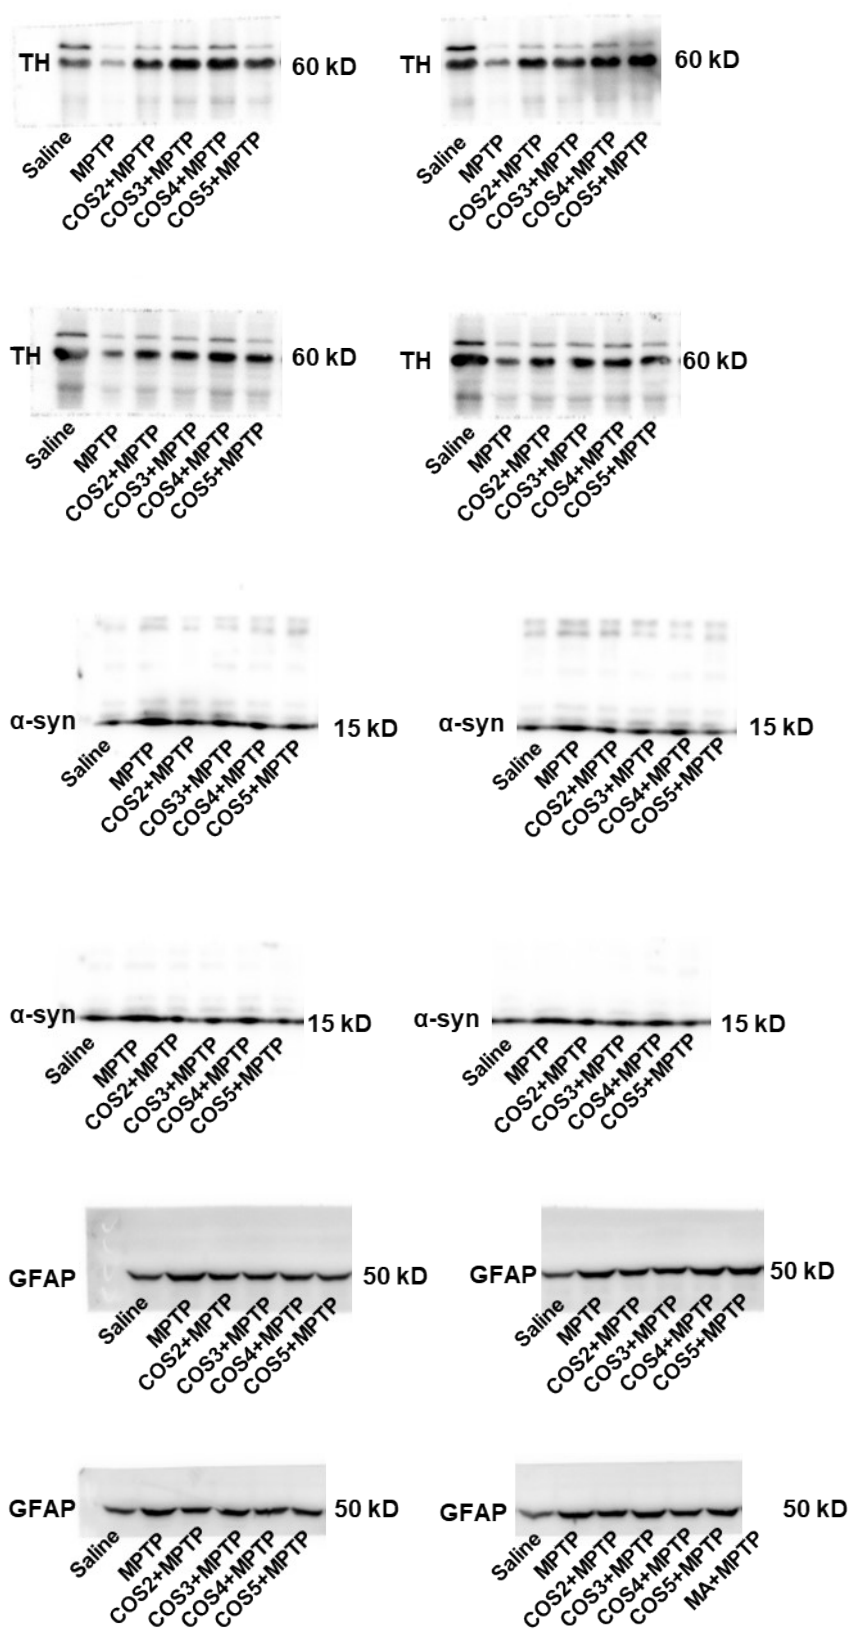

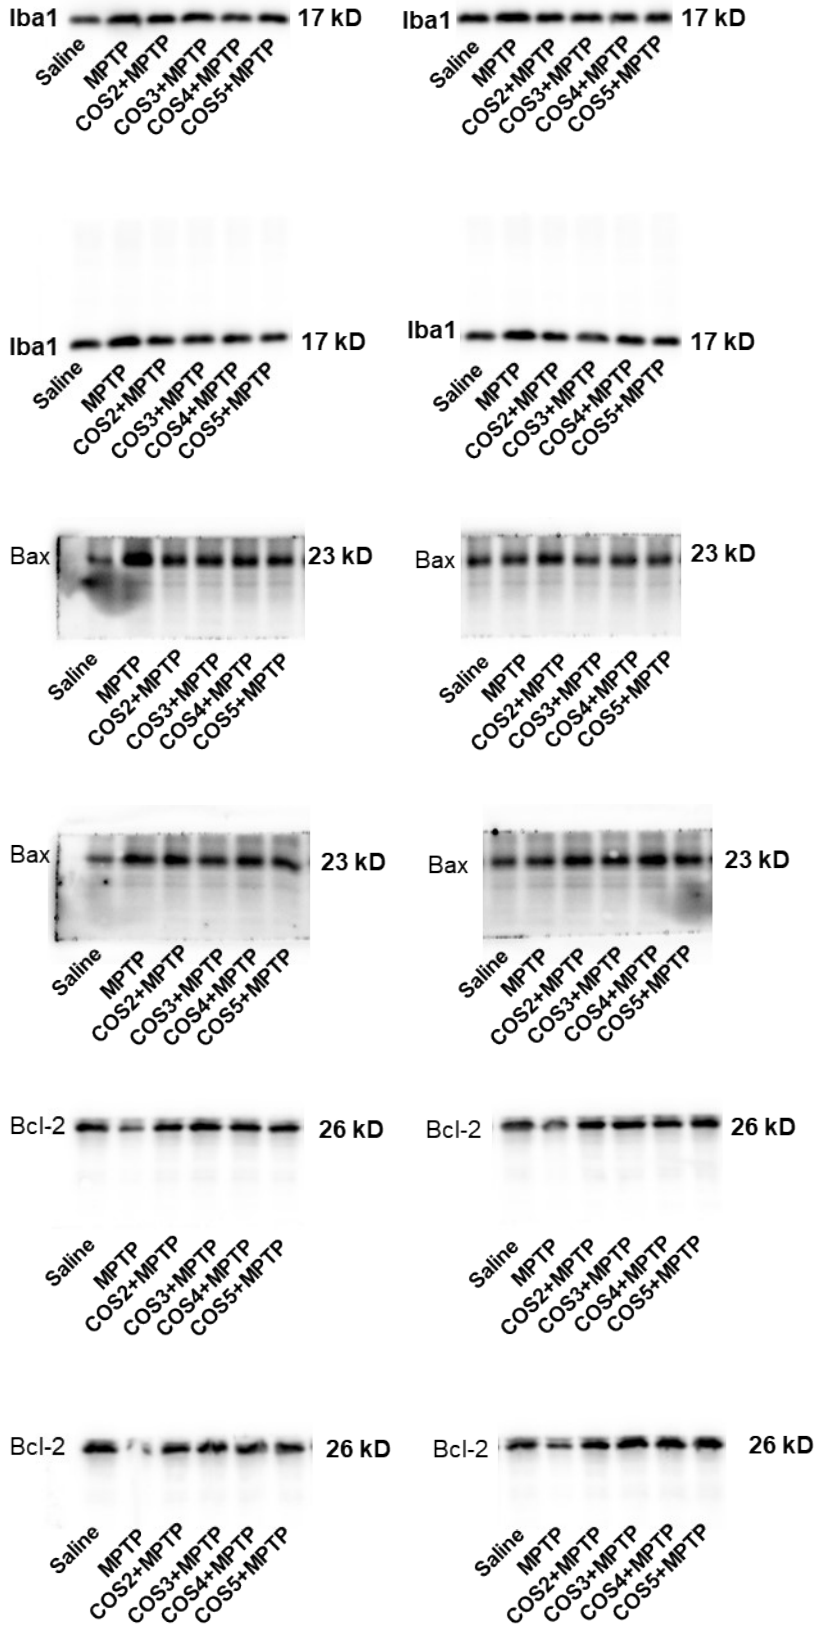

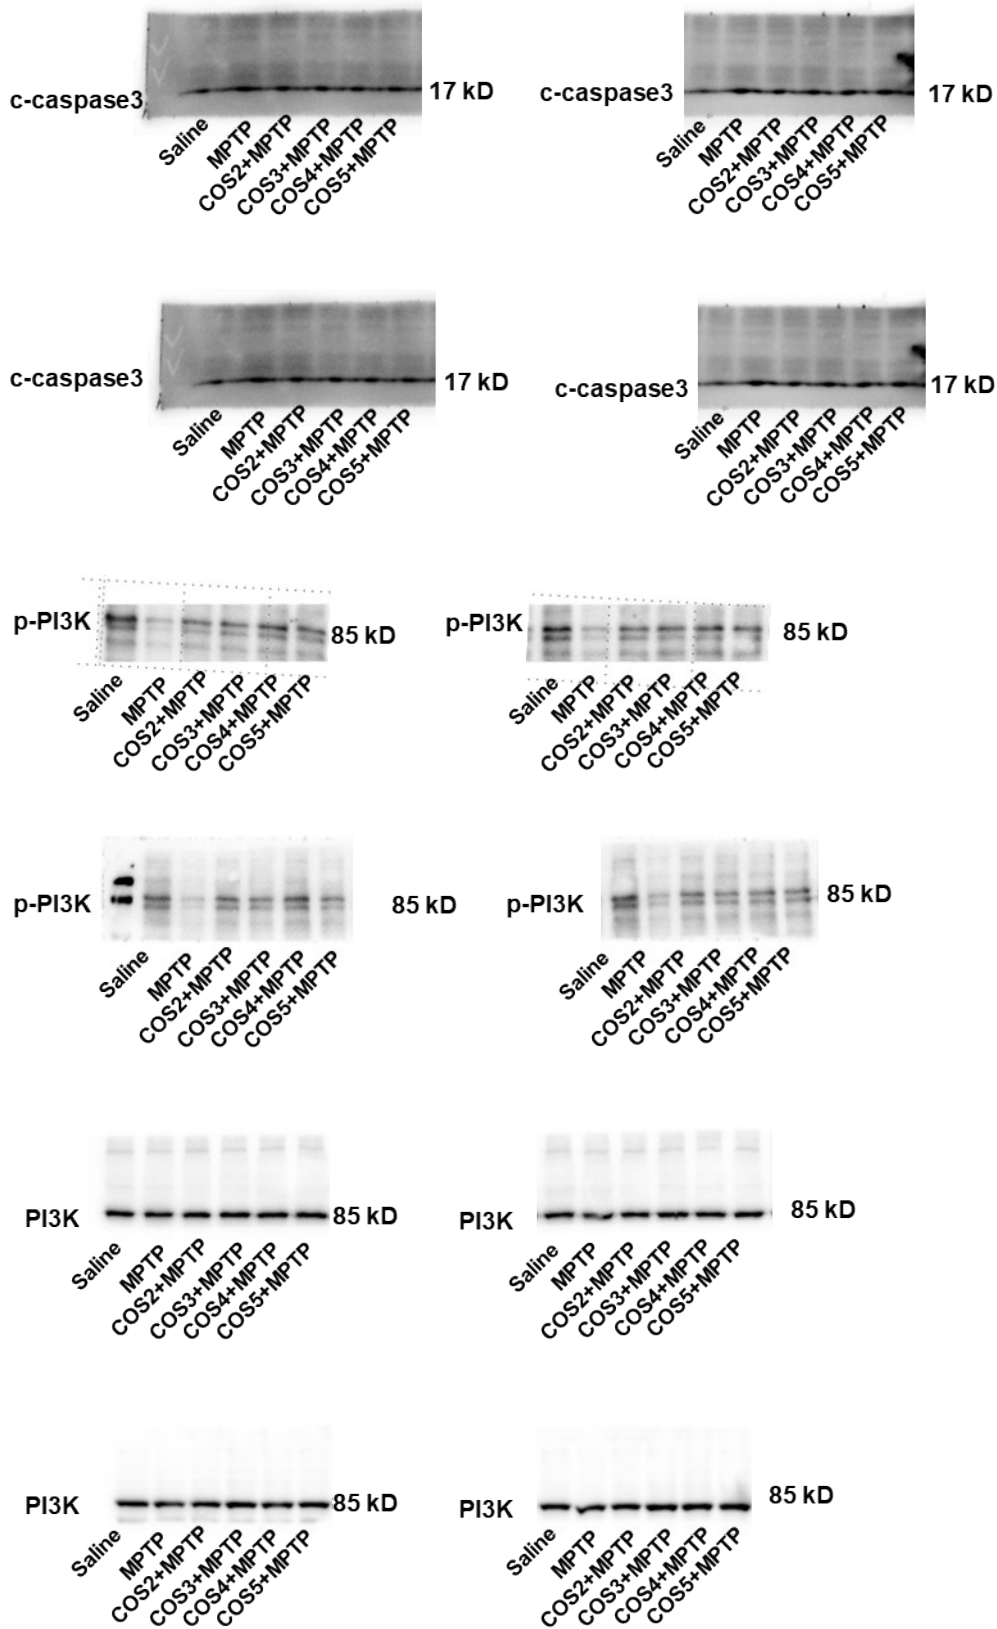

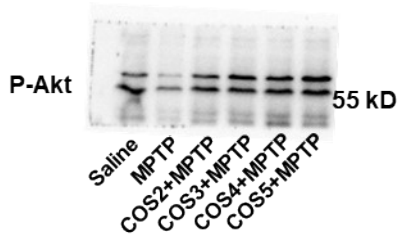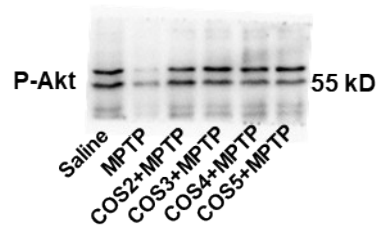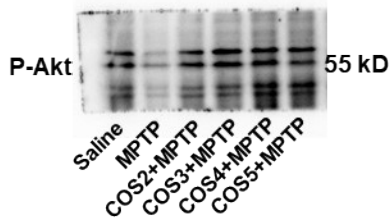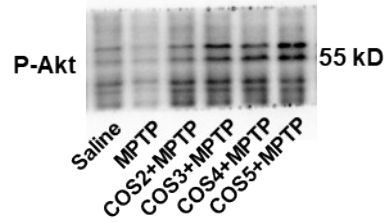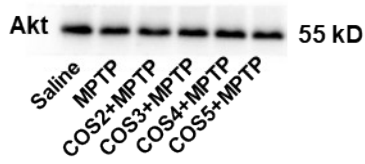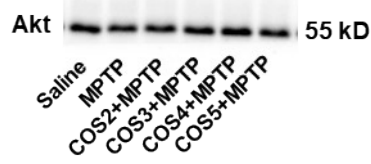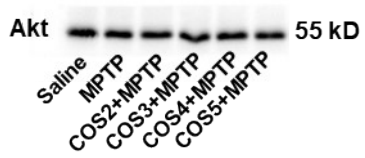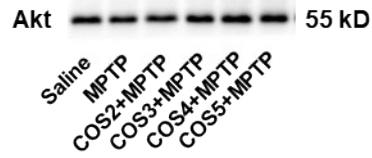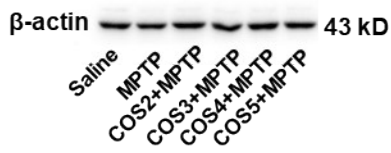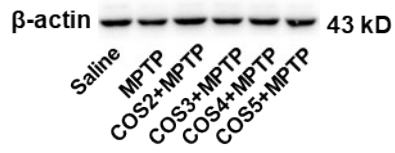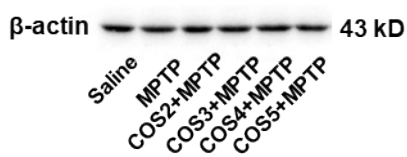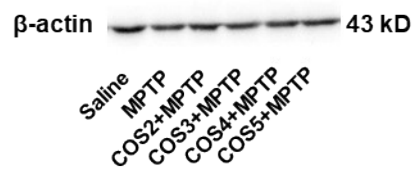

Supplement: d1fo04374a2.pdf [file d1fo04374a2.pdf]

A

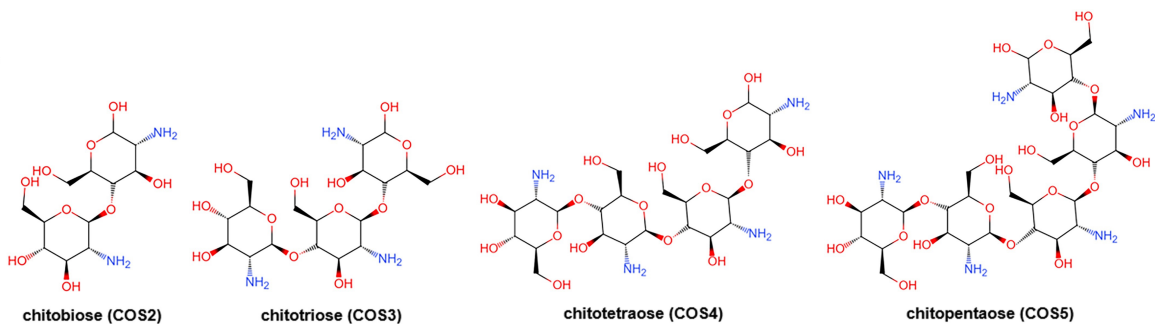

B

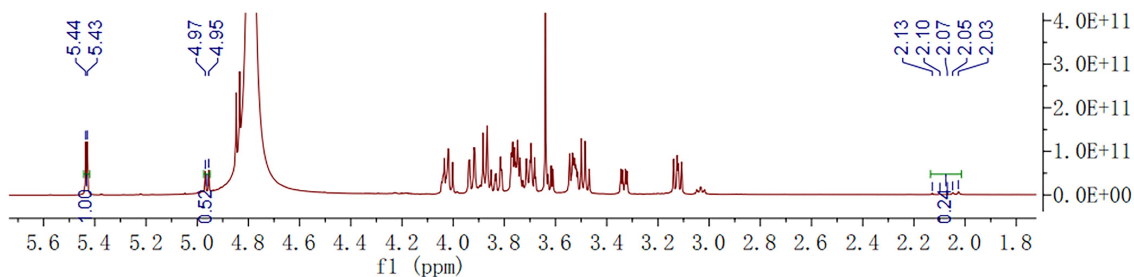

C

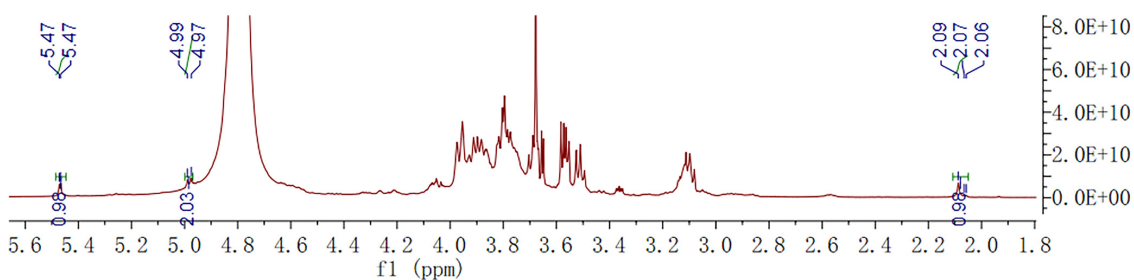

D

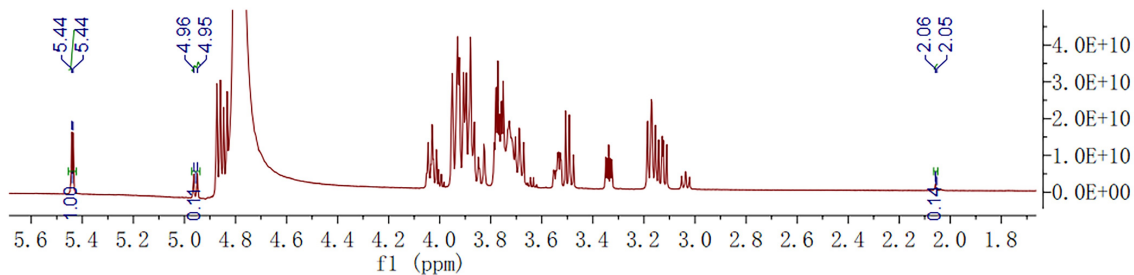

E

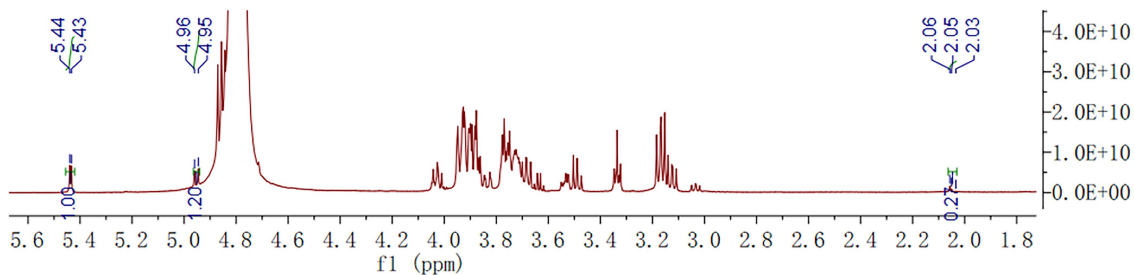

Supplement: d1fo04374a3.pdf [file d1fo04374a3.pdf]
